# Supplementary material
Source: publisher site journal article supplement (https://www.spandidos-publications.com/4159/downloadSupplementary)
Supplement: Supplementary file 1 [file downloadSupplementary]

Table SI. Serum levels of Hs-CRP, MCP-1, spectral curve slope of plaque and calcium content in carotid plaques in the three groups.

| Group           | Hs-CRP, mg/l         | MCP-1, pg/ml   | Calcium content, g/l | Spectral curve slope  |
|-----------------|----------------------|----------------|----------------------|-----------------------|
| Unstable plaque | 15.33 (10.65, 17.35) | 467.13 ± 66.28 | 47.53 ± 37.17        | 0.29 (-3.86, 3.00)    |
| Stable plaque   | 2.38 (1.23, 3.75)    | 351.84 ± 81.89 | 147.85 ± 49.54       | -6.55 (-14.55, -4.50) |
| Normal control  | 1.21 (0.76, 1.50)    | 153.64 ± 49.79 | -                    | -                     |

Values are expressed as the median (interquartile range) or the mean ± standard deviation. Hs-CRP, high-sensitivity C-reactive protein; MCP-1, monocyte chemotactic protein-1.

Table SII. ROC curve analysis of calcium content in plaque and curve slope of plaque, serum levels of Hs-CRP, MCP-1 in plaque groups. The ROC curves were constructed for calculation of AUC, optimal cut-off value with maximum sensitivity and specificity.

| Variable             | AUC    | SE      | 95% CI        | P-value | Optimal cut-off value | Sensitivity, % | Specificity, % |
|----------------------|--------|---------|---------------|---------|-----------------------|----------------|----------------|
| Calcium content      | 0.9379 | 0.0305  | 0.8781-0.9977 | <0.0001 | 101.5 pg/ml           | 73.33          | 100            |
| Spectral curve slope | 0.9417 | 0.02986 | 0.8831-1      | <0.0001 | 3.835                 | 96.67          | 77.27          |
| Hs-CRP               | 1      | 0       | 1-1           | <0.0001 | 7.14 mg/l             | 100            | 100            |
| MCP-1                | 0.9012 | 0.05026 | 0.8027-0.9997 | <0.0001 | 392.4 pg/ml           | 84             | 100            |

ROC, receiver operating characteristic; AUC, area under the ROC curve; SE, standard error; CI, confidence interval; Hs-CRP, high-sensitivity C-reactive protein; MCP-1, monocyte chemotactic protein-1.
